# Supplementary material for: The petroleum ether extract ofBrassica rapaL. induces apoptosis of lung adenocarcinoma cellsviathe mitochondria-dependent pathway
Source: Royal Society of Chemistry journal article supplement (doi:10.1039/d1fo01547h), 2021-01-01
Supplement: d1fo01547h1.pdf [file d1fo01547h1.pdf]

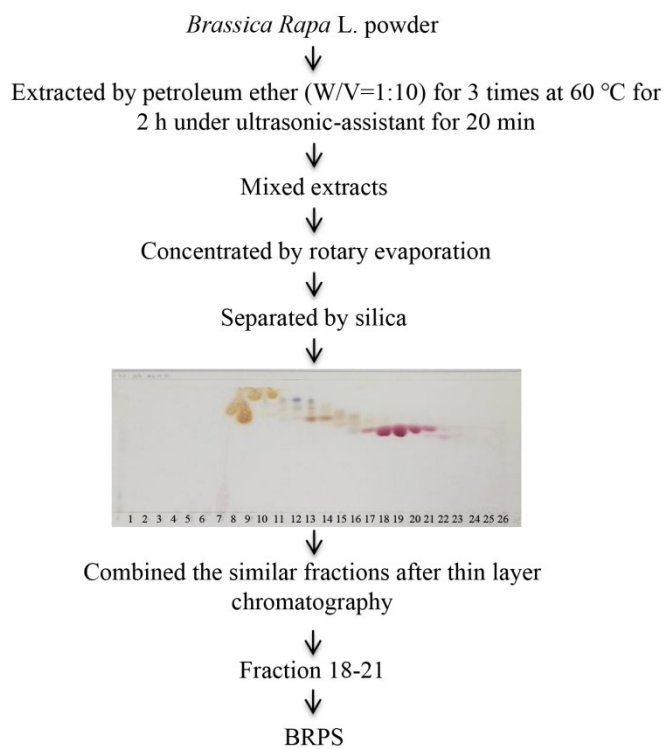

Fig. S1: The process of BRPS preparation.

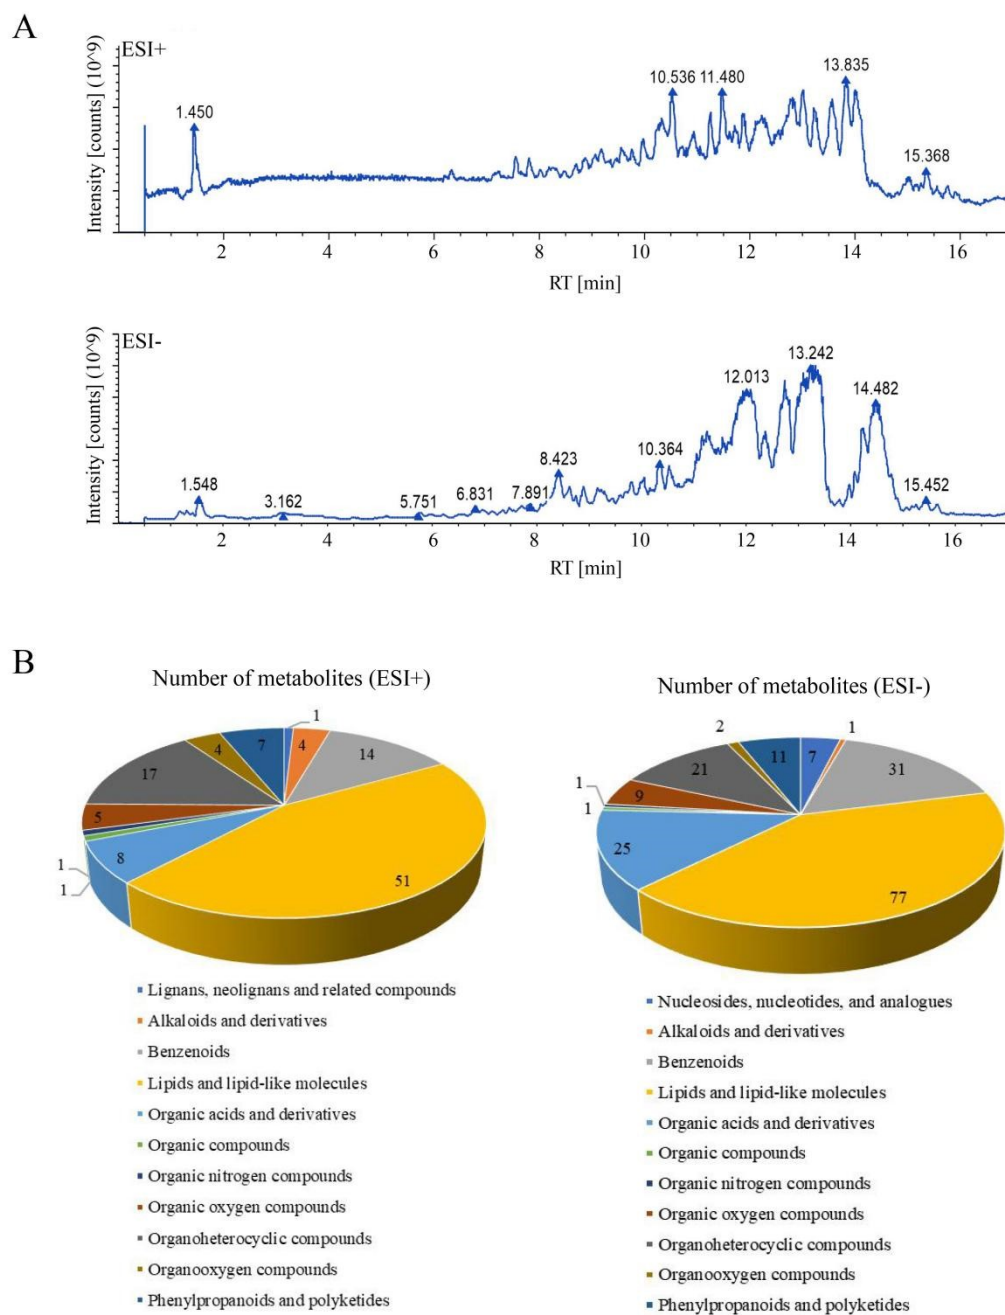

Fig. S2 The BRPS identified by LC-MS. (A) TIC diagram for different ion modes of BRPS. (B) Composition identification in different ionic modes of BRPS.
